# Supplementary material for: Dual roles of nanocrystalline cellulose extracted from jute (Corchorus olitorius L.) leaves in resisting antibiotics and protecting probiotics
Source: Royal Society of Chemistry journal article supplement (doi:10.1039/d3na00345k), 2023-01-01
Supplement: d3na00345k1.pdf [file d3na00345k1.pdf]

Supplementary Information for

**Dual roles of nanocrystalline cellulose extracted from jute (*Corchorus olitorius* L.) leaves in resisting antibiotics and protecting probiotics**

**Yanchun Deng<sup>a†</sup>, Jiangpeng Pan<sup>a†</sup>, Xiai Yang<sup>a†</sup>, Sa Yang<sup>b,c</sup>, Haiyang Chi<sup>a</sup>, Xiushi Yang<sup>a</sup>, Xiaoxin Qu<sup>a</sup>, Shitao Sun<sup>a</sup>, Linfeng You<sup>d\*</sup>, Chunsheng Hou<sup>a\*</sup>**

<sup>a</sup> *Institute of Bast Fiber Crops, Chinese Academy of Agricultural Sciences, Changsha 410205, P. R. China*

<sup>b</sup> *Institute of Apicultural Research, Chinese Academy of Agricultural Sciences, Beijing 100093, P. R. China*

<sup>c</sup> *Graduate School of Chinese Academy of Agricultural Sciences, Beijing 100081, P. R. China*

<sup>d</sup> *Department of Food and Biotechnology Engineering, Chongqing Technology and Business University, Chongqing 400067, P.R. China*

<sup>†</sup> These authors contributed equally.

\* Correspondence: [youlf@ctbu.edu.cn](mailto:youlf@ctbu.edu.cn) (L. You) or [houchunsheng@caas.cn](mailto:houchunsheng@caas.cn) (C. Hou)

49 **Supplementary figures**

50

51 **Fig. S1. The biological potential protective effects of jute NCC on human gut bacteria**

52 (*Escherichia coli*) after kanamycin treatment. (A) Effects of cellulose and NCC (50

53  $\mu\text{g/mL}$ ) on growth curves of gut bacteria after ampicillin treatment ( $10 \mu\text{g/mL}$ ). (B-C) Effects

54 of cellulose and NCC ( $50 \mu\text{g/mL}$ ) on the bacterial colonies of gut bacteria after ampicillin

55 treatment were presented on the plates for 18 h. Jute 0 represents jute cellulose; Jute 1

56 represents jute nanocrystalline cellulose; Amp represents ampicillin treatment.

57

58

59

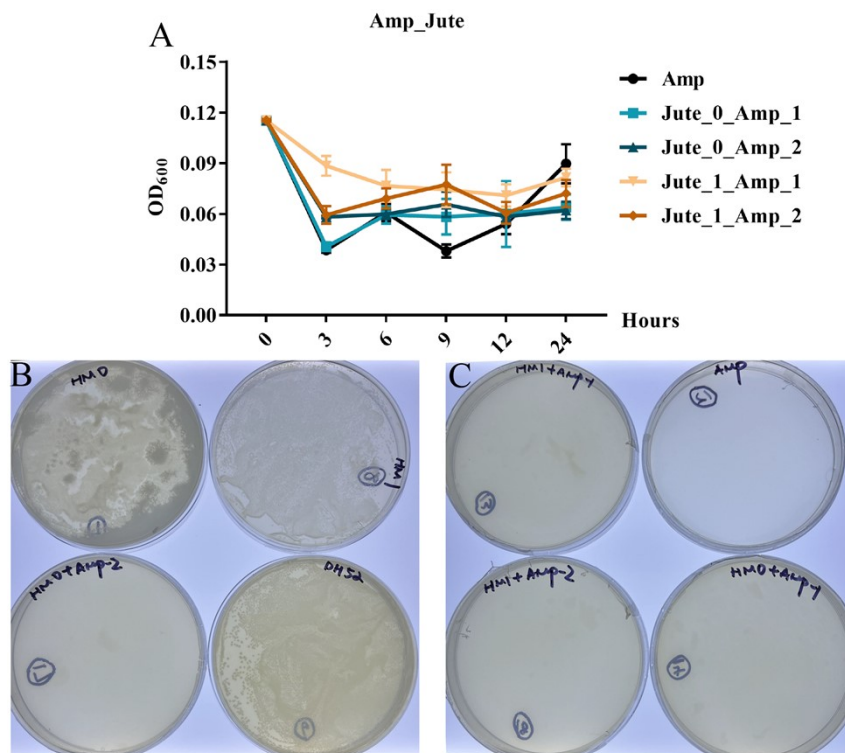

60

61 **Fig. S2. The effect of different concentration of jute NCC on survival rate of honeybees.**

62 H: high,  $100 \mu\text{g/mL}$ ; M: medium,  $10 \mu\text{g/mL}$ , and L: low,  $1 \mu\text{g/mL}$ .

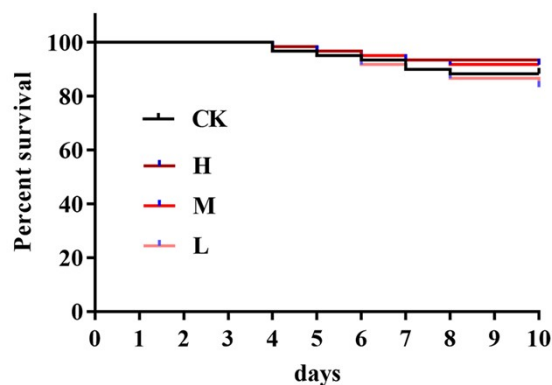

63
